# Supplementary material
Source: PubMed Central journal article supplement (PMC3500389)
Supplement: NIHMS409087-supplement-Supplementary_figure.pdf [file NIHMS409087-supplement-Supplementary_figure.pdf]

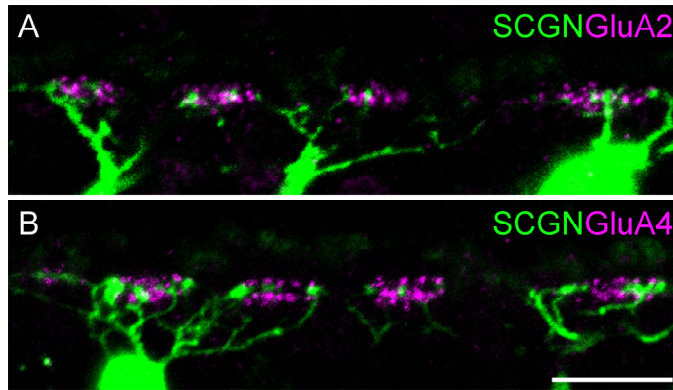

Supplementary Figure 1: Glutamate receptors of DB1 bipolar cells. Double labeling with SCGN and the AMPA receptor subunits GluA2 (A) and GluA4 (B). The dendritic tips of the SCGN labelled DB1 cells terminate in between the two major bands of GluA receptor puncta and little overlap is observed. Images are confocal projections ( $4 \times 0.4 \mu\text{m}$ ). Scale bar =  $10 \mu\text{m}$ .
